# Supplementary material
Source: MDPI journal article supplement (https://www.mdpi.com/2076-3417/12/9/4222)
Supplement: s1 [file s1]

## Supplementary Materials

**Table S1. The rates of vertical deformation ( $D_v$ ) at Block JJ1 to JJ30.**

| Block No. | Number of Pixel | Minimum Velocity (mm/a) | Maximum Velocity (mm/a) | Mean Velocity (MV, mm/a) | Standard Deviation |
|-----------|-----------------|-------------------------|-------------------------|--------------------------|--------------------|
| JJ1       | 16350           | -3.894069               | 4.49473                 | 0.333402                 | 0.64015            |
| JJ2       | 20420           | -3.176241               | 3.710044                | 0.603279                 | 0.548625           |
| JJ3       | 9177            | -3.184966               | 3.58694                 | 0.42099                  | 0.531723           |
| JJ4       | 11935           | -3.000003               | 3.601094                | 0.090212                 | 0.579021           |
| JJ5       | 12066           | -4.0415                 | 3.215469                | -0.261049                | 0.511148           |
| JJ6       | 23933           | -4.797726               | 5.462986                | -0.195122                | 0.699422           |
| JJ7       | 7253            | -3.775571               | 2.550992                | 0.06616                  | 0.496741           |
| JJ8       | 4719            | -3.069048               | 2.584744                | 0.016909                 | 0.429131           |
| JJ9       | 21904           | -3.073226               | 3.381492                | 0.16612                  | 0.541842           |
| JJ10      | 16514           | -3.893602               | 3.458496                | 0.255793                 | 0.590487           |
| JJ11      | 33052           | -4.036974               | 4.301537                | -0.182846                | 0.706877           |
| JJ12      | 40877           | -3.583298               | 4.088709                | -0.046763                | 0.533174           |
| JJ13      | 10104           | -2.721501               | 3.170934                | 0.042745                 | 0.451927           |
| JJ14      | 9281            | -4.296067               | 3.164828                | -0.138046                | 0.562729           |
| JJ15      | 8204            | -4.296057               | 3.426404                | 0.013672                 | 0.58054            |
| JJ16      | 10274           | -2.688271               | 3.175597                | 0.155306                 | 0.603395           |
| JJ17      | 4556            | -2.494572               | 2.547204                | 0.156877                 | 0.506029           |
| JJ18      | 5332            | -3.001885               | 3.252318                | -0.09166                 | 0.703242           |
| JJ19      | 31958           | -4.430243               | 4.239609                | 0.346116                 | 0.603452           |
| JJ20      | 9683            | -3.654682               | 4.048138                | 0.163341                 | 0.585593           |
| JJ21      | 15449           | -4.503315               | 3.555163                | -0.032049                | 0.580889           |
| JJ22      | 33368           | -4.42211                | 3.807693                | -0.405392                | 0.740832           |
| JJ23      | 25539           | -3.671714               | 3.298793                | -0.31908                 | 0.575998           |
| JJ24      | 11776           | -3.497089               | 3.342709                | -0.28047                 | 0.560811           |
| JJ25      | 5572            | -3.251789               | 2.753029                | -0.392946                | 0.559951           |
| JJ26      | 50474           | -4.318373               | 2.994146                | -0.194229                | 0.644477           |
| JJ27      | 52355           | -4.105183               | 5.193277                | 0.285525                 | 0.704089           |
| JJ28      | 5759            | -2.273194               | 2.594696                | 0.142937                 | 0.536243           |
| JJ29      | 14206           | -3.446468               | 3.683069                | -0.300956                | 0.570608           |
| JJ30      | 14559           | -3.281409               | 2.944386                | -0.287393                | 0.570474           |

**Table S2. The rates of eastward deformation ( $D_E$ ) at Block JJ1 to JJ30.**

| <b>Block No.</b> | <b>Number of Pixel</b> | <b>Minimum Velocity (mm/a)</b> | <b>Maximum Velocity (mm/a)</b> | <b>Mean Velocity (MV, mm/a)</b> | <b>Standard Deviation</b> |
|------------------|------------------------|--------------------------------|--------------------------------|---------------------------------|---------------------------|
| JJ1              | 16350                  | -5.758832                      | 3.541012                       | -0.455456                       | 0.811702                  |
| JJ2-1            | 8099                   | -4.720730                      | 4.838473                       | -0.245612                       | 0.610903                  |
| JJ2-2            | 12321                  | -5.280182                      | 4.672123                       | -0.064759                       | 0.679471                  |
| JJ3              | 9177                   | -4.487466                      | 4.094117                       | -0.259786                       | 0.656316                  |
| JJ4              | 11935                  | -3.999849                      | 4.103514                       | 0.025237                        | 0.68333                   |
| JJ5              | 12066                  | -4.000404                      | 4.329263                       | -0.004975                       | 0.604281                  |
| JJ6              | 23933                  | -6.565968                      | 4.643138                       | -0.118904                       | 0.857474                  |
| JJ7              | 7253                   | -3.269053                      | 3.66458                        | -0.150647                       | 0.620036                  |
| JJ8              | 4719                   | -3.1087                        | 2.665932                       | -0.429613                       | 0.512751                  |
| JJ9              | 21904                  | -5.82451                       | 4.27875                        | -0.332241                       | 0.696017                  |
| JJ10             | 16514                  | -6.74914                       | 4.858219                       | -0.384521                       | 0.740736                  |
| JJ11             | 33052                  | -5.016384                      | 5.885344                       | 0.265532                        | 0.897271                  |
| JJ12             | 40877                  | -4.293799                      | 4.842495                       | 0.217528                        | 0.63639                   |
| JJ13             | 10104                  | -2.477616                      | 3.963286                       | 0.22389                         | 0.55633                   |
| JJ14             | 9281                   | -3.233111                      | 4.449233                       | 0.28892                         | 0.629812                  |
| JJ15             | 8204                   | -4.315757                      | 4.231105                       | 0.123415                        | 0.677422                  |
| JJ16             | 10274                  | -3.565212                      | 3.319211                       | -0.102372                       | 0.673379                  |
| JJ17             | 4556                   | -3.708089                      | 3.484036                       | -0.285708                       | 0.703621                  |
| JJ18             | 5332                   | -4.562542                      | 3.260481                       | -0.479942                       | 0.802021                  |
| JJ19             | 31958                  | -4.671633                      | 4.706153                       | -0.537842                       | 0.6887                    |
| JJ20             | 9683                   | -4.814134                      | 4.67908                        | -0.195497                       | 0.693076                  |
| JJ21             | 15449                  | -3.100635                      | 4.217124                       | 0.053447                        | 0.635977                  |
| JJ22             | 33368                  | -4.579877                      | 5.63343                        | -0.008446                       | 0.861818                  |
| JJ23             | 25539                  | -5.182288                      | 3.698396                       | -0.27613                        | 0.647623                  |
| JJ24             | 11776                  | -3.888826                      | 2.883733                       | -0.299958                       | 0.564508                  |
| JJ25             | 5572                   | -3.659731                      | 3.922847                       | -0.293707                       | 0.57983                   |
| JJ26             | 50474                  | -5.684078                      | 6.098427                       | -0.0446                         | 0.752988                  |
| JJ27             | 52355                  | -7.112432                      | 4.689692                       | -0.507749                       | 0.84649                   |
| JJ28             | 5759                   | -3.33238                       | 3.472687                       | 0.090146                        | 0.654632                  |
| JJ29             | 14206                  | -3.671894                      | 4.147851                       | 0.196213                        | 0.658631                  |
| JJ30             | 14559                  | -3.921628                      | 4.071153                       | 0.206715                        | 0.646602                  |

Table S3. The average ground displacements at Blocks JJ3, JJ6, JJ7, JJ12, JJ19 and JJ21.

|            | Block JJ6         |                    | Block JJ7         |                    | Block JJ3         |                    | Block JJ2         |                    | Block JJ21        |                    | Block JJ19        |                    |
|------------|-------------------|--------------------|-------------------|--------------------|-------------------|--------------------|-------------------|--------------------|-------------------|--------------------|-------------------|--------------------|
|            | displacement (mm) | standard deviation |
| 08/10/2017 | 0.0000            | 0.0000             | 0.0000            | 0.0000             | 0.0000            | 0.0000             | 0.0000            | 0.0000             | 0.0000            | 0.0000             | 0.0000            | 0.0000             |
| 20/10/2017 | 0.6658            | 0.8399             | 0.4895            | 0.8957             | -1.0457           | 1.1676             | 0.1584            | 0.9809             | 0.6437            | 0.5816             | 0.7358            | 0.5720             |
| 01/11/2017 | -0.9183           | 0.6651             | 0.3002            | 0.9270             | -1.1061           | 1.0192             | -0.9351           | 0.7980             | -0.6426           | 0.6703             | 0.4379            | 0.5908             |
| 13/11/2017 | 1.1310            | 0.7620             | 0.7862            | 0.9184             | 0.5790            | 1.1817             | 0.3538            | 0.8584             | 0.1577            | 0.5840             | 0.1847            | 0.6128             |
| 25/11/2017 | -0.8072           | 0.9477             | -0.3536           | 0.9566             | -0.9039           | 1.2693             | -0.8867           | 1.1584             | -0.4941           | 0.7541             | -0.2308           | 0.6381             |
| 07/12/2017 | 1.3145            | 0.9143             | 0.7239            | 0.8967             | 0.5669            | 1.2088             | 0.3499            | 1.2098             | 0.4625            | 0.8826             | 0.3236            | 0.8301             |
| 19/12/2017 | -0.8465           | 1.0000             | 0.3333            | 0.9890             | -0.9210           | 1.0989             | -1.1093           | 1.1817             | 0.4199            | 0.9881             | -0.3560           | 1.0508             |
| 31/12/2017 | 0.2921            | 0.9409             | -0.2246           | 1.1365             | 0.3031            | 1.2235             | -0.3058           | 1.1739             | 0.0048            | 0.8797             | -0.4040           | 0.6284             |
| 12/01/2018 | 0.7166            | 1.0470             | 0.3900            | 0.8414             | 0.4240            | 1.0723             | 0.2790            | 0.9741             | -0.0177           | 0.9319             | 0.2252            | 0.6332             |
| 24/01/2018 | -0.7405           | 1.0251             | -0.5320           | 1.1782             | -0.9726           | 1.6310             | -0.9170           | 1.1985             | -0.5132           | 0.9183             | -1.0303           | 1.4784             |
| 05/02/2018 | 1.1682            | 0.9139             | 0.9759            | 0.9863             | 0.8328            | 1.5404             | 0.3982            | 1.3540             | -0.0657           | 0.9615             | 0.0534            | 1.3608             |
| 17/02/2018 | 1.4450            | 1.0431             | 1.2950            | 1.3189             | 0.9418            | 1.8590             | 0.6029            | 1.4439             | 0.8706            | 1.2980             | 0.2967            | 1.1705             |
| 01/03/2018 | 0.4959            | 1.1093             | -0.1609           | 1.1217             | 0.2201            | 1.5116             | 0.3011            | 1.3967             | 0.1951            | 1.1089             | 0.1041            | 0.9674             |
| 13/03/2018 | 1.0928            | 1.0181             | 0.6745            | 0.9941             | 0.6967            | 1.4568             | 0.5632            | 1.2838             | 0.5806            | 0.8912             | 0.3576            | 0.8109             |
| 25/03/2018 | 0.0269            | 1.0849             | -0.1627           | 0.9518             | 0.6527            | 1.2663             | 0.5638            | 1.1437             | 0.4556            | 0.7912             | 0.2272            | 0.7369             |
| 06/04/2018 | -0.7907           | 0.9902             | -0.2628           | 1.0741             | -1.0307           | 1.3734             | -0.5188           | 1.2921             | -0.6430           | 0.9588             | -0.9352           | 1.0669             |
| 18/04/2018 | -0.4430           | 0.8802             | -0.4401           | 1.0132             | -0.6431           | 1.1802             | -0.1675           | 1.0630             | 0.0667            | 0.7852             | -0.2651           | 0.5193             |
| 30/04/2018 | 0.4543            | 0.8253             | 0.4506            | 1.2822             | 0.3939            | 1.2962             | -0.1154           | 1.0611             | -0.2581           | 1.0068             | -0.1174           | 0.7823             |
| 12/05/2018 | -0.7342           | 0.9291             | -0.5452           | 1.0939             | -0.6177           | 1.0906             | -0.7404           | 1.1667             | -0.3275           | 0.5583             | -0.4642           | 0.7104             |
| 24/05/2018 | 0.1813            | 1.0104             | 0.0972            | 1.0681             | 0.1268            | 1.1878             | -0.5515           | 1.1272             | -0.4904           | 0.9321             | -0.2956           | 0.8908             |
| 05/06/2018 | 0.1620            | 0.9345             | -0.1679           | 1.0374             | 0.6379            | 1.0309             | -1.0096           | 1.1352             | -0.5405           | 0.7285             | -0.6945           | 0.8002             |
| 17/06/2018 | 0.1253            | 0.8439             | 0.1810            | 1.1407             | -0.0913           | 1.1473             | 0.3188            | 1.0207             | 0.1107            | 0.6341             | 0.2494            | 1.0029             |
| 11/07/2018 | -0.0114           | 0.8587             | -0.5365           | 0.9623             | -0.5244           | 1.2837             | -0.7442           | 1.4045             | 0.4493            | 1.3056             | -0.8149           | 0.8302             |
| 23/07/2018 | -0.1976           | 0.9162             | -0.0503           | 1.0246             | 1.0063            | 1.4073             | -1.1989           | 1.4009             | -0.3131           | 1.4295             | 0.4742            | 0.8202             |
| 04/08/2018 | -0.1340           | 2.3946             | 0.6346            | 1.8731             | 1.1127            | 2.2637             | 0.7546            | 1.7951             | 0.3124            | 2.5501             | 1.5707            | 1.9770             |

|            |         |        |         |        |         |        |         |        |         |        |         |        |
|------------|---------|--------|---------|--------|---------|--------|---------|--------|---------|--------|---------|--------|
| 16/08/2018 | 0.0403  | 1.8507 | 0.2878  | 1.6452 | 0.0464  | 2.8474 | -0.2831 | 2.3165 | 0.6227  | 1.7913 | -0.0506 | 1.2255 |
| 28/08/2018 | 0.6258  | 1.5326 | 1.1500  | 1.4083 | 1.2695  | 1.9455 | 0.0829  | 1.6013 | 0.2608  | 1.9190 | 0.4832  | 2.1310 |
| 09/09/2018 | -0.3562 | 1.0027 | 0.2697  | 1.1316 | -0.0001 | 1.4588 | -0.6592 | 1.4567 | -0.6147 | 1.0522 | 0.3228  | 0.8958 |
| 21/09/2018 | -0.5959 | 1.0309 | -0.4932 | 0.9747 | -0.2799 | 1.4369 | -1.3580 | 1.4672 | -0.3676 | 1.2447 | -0.4111 | 1.0714 |
| 03/10/2018 | 0.0797  | 0.9402 | 0.7040  | 0.9528 | 1.2144  | 1.2636 | 0.0385  | 1.2243 | 0.5206  | 1.1520 | 1.1326  | 0.8442 |
| 15/10/2018 | -0.4781 | 0.9994 | -0.4950 | 1.0739 | -0.3382 | 1.2620 | -1.3844 | 1.3432 | -0.5069 | 0.6246 | -0.2352 | 1.1225 |
| 27/10/2018 | -0.0821 | 0.9169 | 0.0858  | 1.0513 | 0.3193  | 1.2615 | -0.1948 | 1.3171 | 0.1765  | 0.8565 | 0.8404  | 1.1986 |
| 08/11/2018 | 0.5047  | 0.8406 | 0.6215  | 1.1182 | 0.3590  | 1.1762 | -0.5948 | 1.2336 | 0.1623  | 1.0456 | 0.8207  | 0.9019 |
| 20/11/2018 | -0.0589 | 1.4458 | 0.1295  | 1.4826 | -0.3938 | 1.2852 | -1.2472 | 1.4097 | -0.0874 | 1.1458 | -0.0773 | 1.2138 |
| 02/12/2018 | -0.5065 | 1.8242 | -0.4869 | 1.8944 | -0.3343 | 2.3951 | -0.8296 | 1.9415 | -0.1501 | 1.2267 | 0.0511  | 2.1319 |
| 14/12/2018 | 0.2679  | 1.2734 | 0.6826  | 1.4667 | 0.9641  | 1.6283 | -0.2817 | 1.6600 | 0.3710  | 1.3805 | 0.6546  | 0.9102 |
| 26/12/2018 | 0.3626  | 1.1085 | 0.5060  | 1.2786 | 0.4958  | 1.3007 | -0.4124 | 1.7501 | -0.1283 | 0.9348 | 0.5325  | 1.0980 |
| 07/01/2019 | -0.3097 | 0.9230 | -0.2348 | 1.3109 | -0.4241 | 1.4842 | -1.0774 | 1.4431 | -0.0866 | 0.9961 | 0.0211  | 1.4704 |
| 19/01/2019 | 0.4194  | 1.2767 | 0.4953  | 1.5871 | 0.5551  | 1.9679 | -0.3152 | 1.9583 | 1.0914  | 1.7236 | 0.9116  | 1.9045 |
| 31/01/2019 | -0.6589 | 1.2666 | -0.2414 | 1.4341 | -0.3304 | 2.1006 | -1.4002 | 1.9022 | -0.2719 | 1.3353 | -0.1693 | 1.8639 |
| 12/02/2019 | -0.1002 | 0.6159 | 0.2759  | 0.7912 | 0.2089  | 1.0238 | -0.4969 | 0.9370 | 0.0397  | 0.8624 | 0.5441  | 0.6789 |
| 24/02/2019 | 0.0840  | 1.0257 | 0.1996  | 1.1638 | 0.2544  | 1.4290 | -0.6415 | 1.7271 | 0.8841  | 0.9039 | 0.6676  | 1.2020 |
| 08/03/2019 | 0.1613  | 0.9406 | 0.4274  | 1.0633 | 0.0774  | 1.4466 | -0.7561 | 1.2950 | -0.0234 | 0.7955 | 0.3238  | 1.1834 |
| 20/03/2019 | -0.0340 | 1.0939 | -0.1962 | 1.3930 | -0.3303 | 1.4462 | -1.2139 | 1.3515 | -0.0266 | 0.7513 | 0.1447  | 1.0097 |
| 01/04/2019 | 0.2168  | 0.9881 | 0.2835  | 1.3389 | 0.2037  | 1.5212 | -0.7170 | 1.3658 | 0.2518  | 1.0417 | 0.2589  | 1.2477 |
| 13/04/2019 | -0.9812 | 2.0648 | 0.1245  | 1.7728 | -0.4032 | 2.6289 | -1.1678 | 1.9566 | -0.6055 | 2.0653 | 0.2659  | 1.7969 |
| 25/04/2019 | 0.5921  | 1.4543 | 0.5305  | 1.3681 | 0.8067  | 1.7559 | -0.0333 | 1.5580 | -0.3391 | 1.3652 | 0.4687  | 1.2883 |
| 07/05/2019 | -0.7007 | 2.4067 | 0.5236  | 2.1576 | 1.1254  | 3.0196 | -0.3141 | 2.5869 | 0.8106  | 2.2539 | 1.3570  | 2.0799 |
| 19/05/2019 | 0.5093  | 1.8334 | 0.6905  | 1.6994 | 0.9661  | 2.4568 | 0.6130  | 2.0329 | 0.3435  | 2.1551 | 0.8974  | 2.0097 |
| 31/05/2019 | 0.0091  | 1.0445 | 0.3569  | 1.1164 | 0.6325  | 1.8516 | -0.8590 | 1.3376 | -0.5865 | 1.1512 | 0.5874  | 0.8900 |
| 12/06/2019 | 0.1489  | 1.0758 | 0.9513  | 1.2293 | 0.6561  | 1.3244 | 0.5094  | 1.4153 | 0.6525  | 1.2170 | 1.5379  | 0.9151 |
| 24/06/2019 | -0.4527 | 2.1685 | 0.1894  | 2.1535 | 0.4611  | 2.8876 | 0.3892  | 2.1748 | 1.5480  | 2.1544 | 0.8967  | 2.2055 |
| 06/07/2019 | -0.6493 | 1.7952 | 0.4182  | 1.8787 | 1.0835  | 1.8299 | -0.0059 | 1.5725 | -0.2326 | 1.6515 | 0.5570  | 1.6118 |
| 18/07/2019 | -1.1011 | 2.7143 | 0.1441  | 2.1265 | 0.3162  | 3.6043 | -1.1018 | 2.2169 | 1.3085  | 2.3503 | 1.3679  | 1.5974 |
| 30/07/2019 | -0.4255 | 1.4849 | 0.2955  | 1.3732 | -0.0864 | 1.5513 | -1.3236 | 1.2763 | -0.4616 | 1.1315 | 0.6210  | 1.0969 |

|            |         |        |         |        |         |        |         |        |         |        |         |        |
|------------|---------|--------|---------|--------|---------|--------|---------|--------|---------|--------|---------|--------|
| 11/08/2019 | 0.7508  | 1.4436 | 0.7945  | 1.5253 | 1.2095  | 1.9415 | 0.4665  | 1.5275 | 1.0663  | 1.5002 | 0.9782  | 1.6189 |
| 23/08/2019 | 0.4077  | 1.6065 | 1.1624  | 1.5320 | 1.0845  | 1.7273 | 0.3907  | 1.4813 | 0.8726  | 0.7970 | 1.3087  | 1.1876 |
| 04/09/2019 | -0.4567 | 1.1353 | -0.1215 | 1.1147 | -0.4343 | 1.5393 | -1.1833 | 1.1676 | -0.5871 | 1.2348 | 0.9540  | 0.7217 |
| 16/09/2019 | -0.0080 | 1.3335 | 0.7573  | 1.4720 | 0.5803  | 2.0582 | -0.1094 | 1.8300 | -0.6707 | 1.5781 | 1.4502  | 1.4397 |
| 28/09/2019 | 0.0818  | 1.2854 | 1.0409  | 1.0699 | 0.9686  | 1.4501 | 0.2263  | 1.3447 | 0.6969  | 1.1949 | 1.6299  | 0.8480 |
| 10/10/2019 | 0.0659  | 1.2113 | 0.6481  | 1.0376 | 0.8251  | 1.4226 | 0.0994  | 1.3713 | 0.3985  | 1.0450 | 1.4184  | 0.8478 |
| 22/10/2019 | -0.3348 | 1.1653 | 0.2345  | 0.9676 | -0.1343 | 1.3175 | -0.0239 | 1.3478 | -0.4287 | 0.9297 | 0.9086  | 0.6585 |
| 03/11/2019 | -0.0292 | 1.0852 | 0.7095  | 1.0545 | 0.4072  | 1.5450 | -0.5826 | 1.2633 | -0.1122 | 1.4011 | 1.2516  | 0.7535 |
| 15/11/2019 | -0.8560 | 1.1276 | 0.1091  | 1.1464 | -0.4446 | 1.4943 | -1.1330 | 1.3172 | -0.6349 | 1.1137 | 0.6901  | 0.9286 |
| 27/11/2019 | 0.2244  | 1.0439 | 0.1389  | 1.1045 | 1.6685  | 1.3965 | -0.4019 | 1.3331 | 0.3929  | 0.7582 | 1.7147  | 1.0849 |
| 09/12/2019 | -0.7006 | 1.1292 | 0.0072  | 1.1016 | 1.0482  | 1.3910 | -1.0799 | 1.0866 | -0.8877 | 1.2956 | -0.0342 | 1.1206 |
| 21/12/2019 | 0.4035  | 1.1128 | 0.8608  | 1.0967 | 0.5741  | 1.5147 | -0.6391 | 1.3578 | 0.8062  | 0.9674 | 1.5932  | 0.7431 |
| 02/01/2020 | -0.4249 | 1.4265 | 0.6610  | 1.3745 | 0.4682  | 1.7782 | -0.6726 | 1.5626 | -0.1104 | 1.1803 | 1.2664  | 0.9079 |
| 14/01/2020 | -0.3477 | 1.2362 | -0.2897 | 1.2476 | 1.1066  | 1.3552 | -1.1853 | 1.4053 | -1.0032 | 1.0134 | 0.7049  | 1.0945 |
| 26/01/2020 | -0.8370 | 1.1658 | 0.3162  | 1.1877 | 0.3980  | 1.5115 | -0.3588 | 1.5438 | -0.4767 | 1.2172 | 0.2646  | 1.4250 |
| 07/02/2020 | -0.4966 | 1.3057 | 0.3989  | 1.1293 | 1.2318  | 1.7281 | -1.1370 | 1.4901 | -0.5427 | 1.4459 | 0.4346  | 0.9382 |

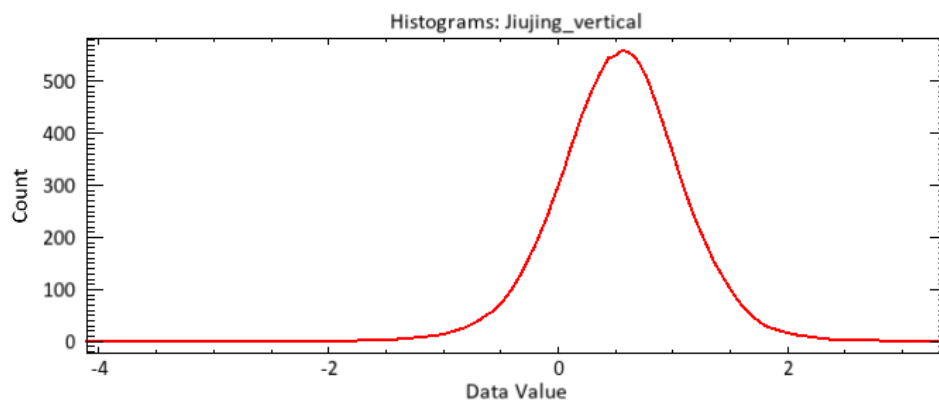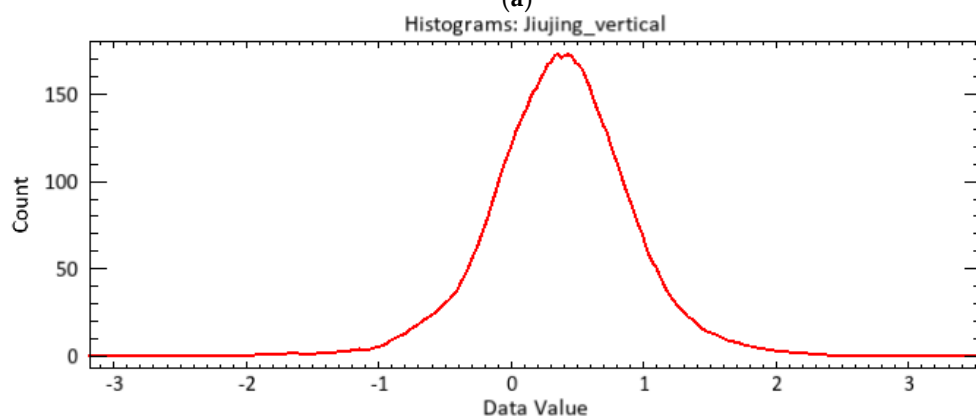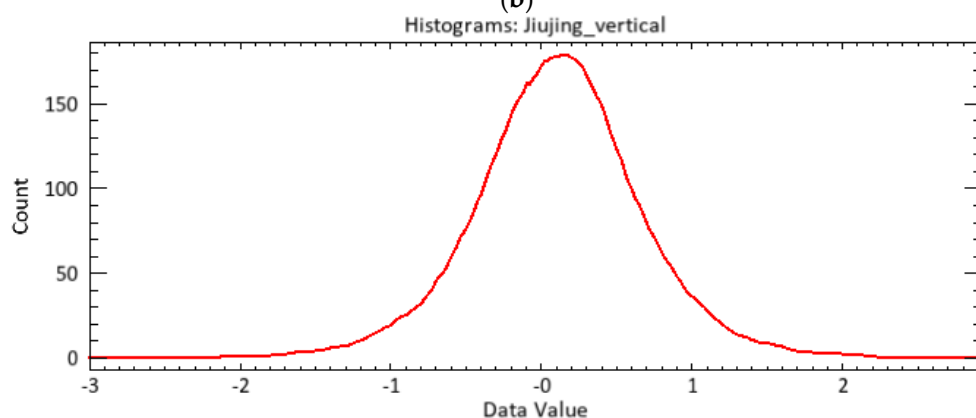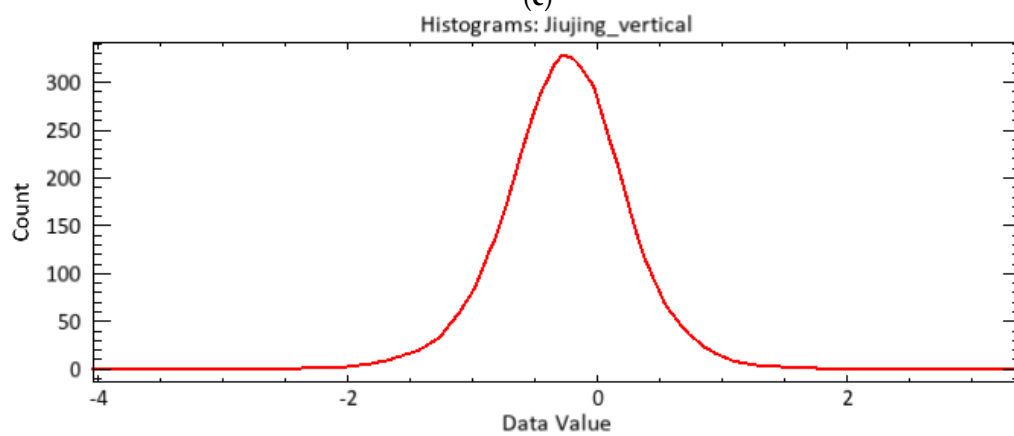

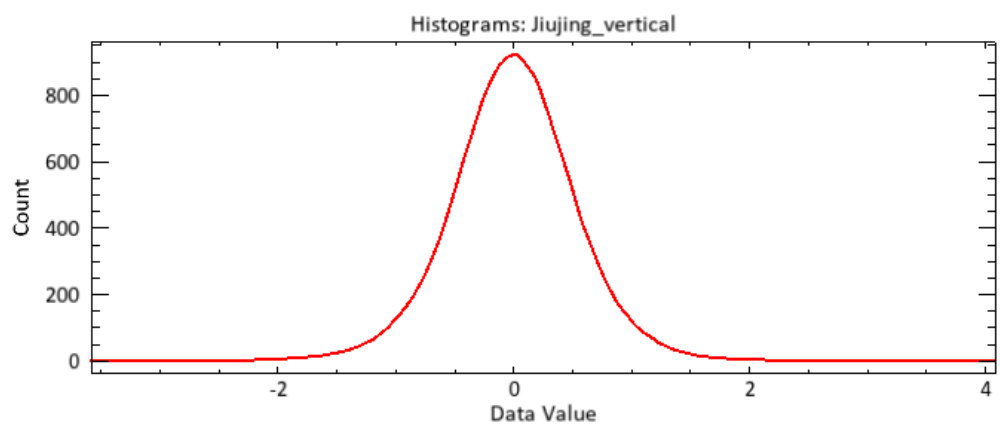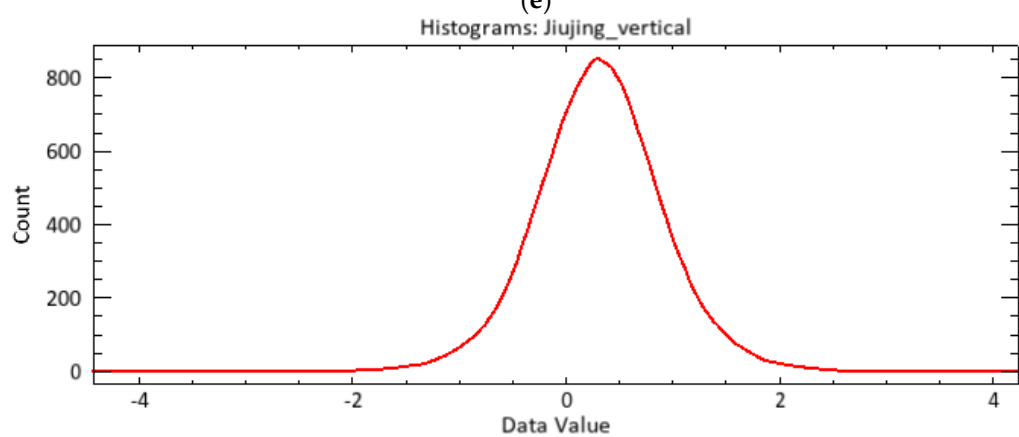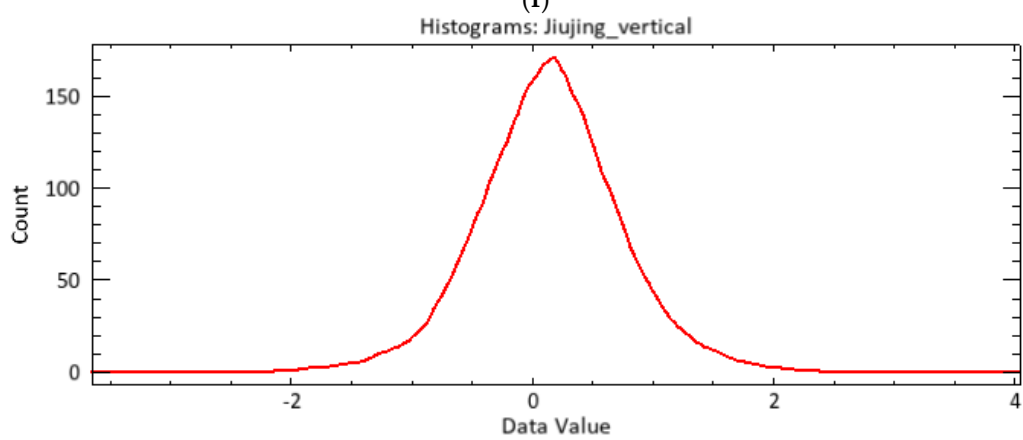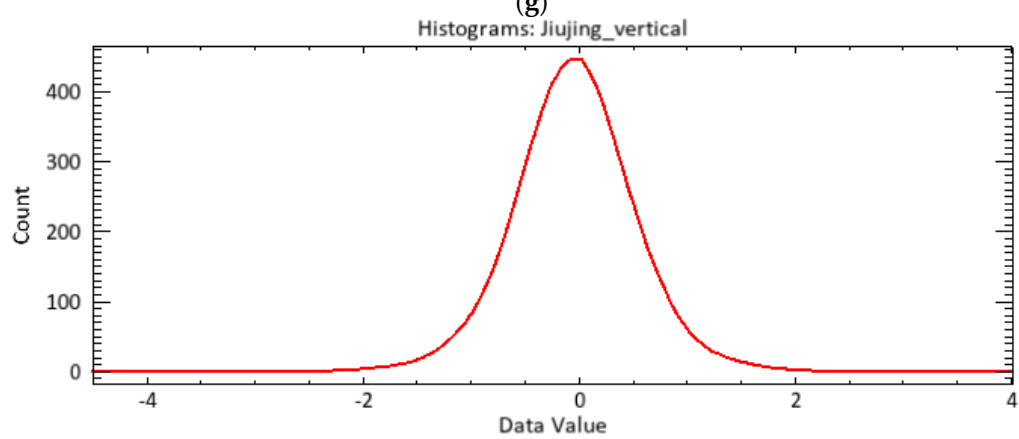

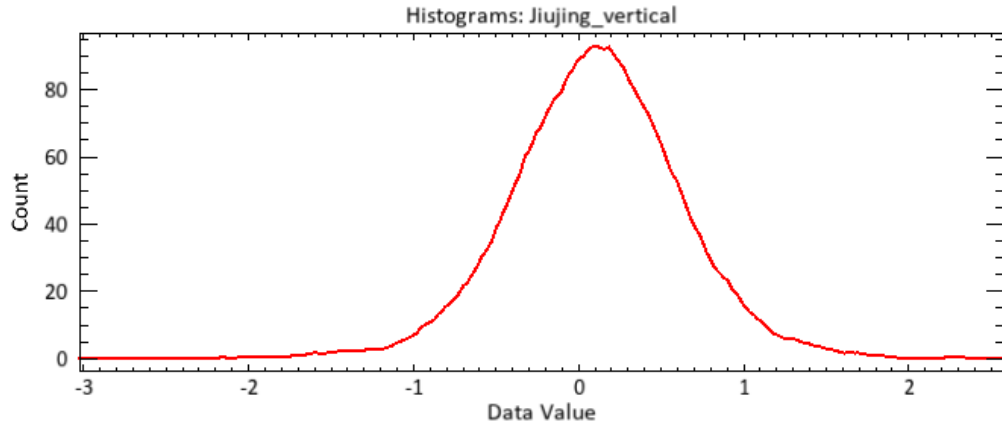

(i)

**Figure S1.** The normal distribution curve of vertical velocity at Block JJ2, JJ3, JJ4, JJ5, JJ12, JJ19, JJ20, JJ21, and JJ28. (a) the normal distribution curve of vertical velocity at Block JJ2. (b) the normal distribution curve of vertical velocity at Block JJ3. (c): the normal distribution curve of vertical velocity at Block JJ4. (d) the normal distribution curve of vertical velocity at Block JJ5. (e) the normal distribution curve of vertical velocity at Block JJ12. (f) the normal distribution curve of vertical velocity at Block JJ19. (g) the normal distribution curve of vertical velocity at Block JJ20. (h) the normal distribution curve of vertical velocity at Block JJ21. (i) the normal distribution curve of vertical velocity at Block JJ28.
